# Supplementary material for: A polydiacetylene–nested porphyrin conjugate for dye-sensitized solar cells
Source: Royal Society of Chemistry journal article supplement (doi:10.1039/c5nj01583a), 2015-01-01
Supplement: c5nj01583a1.pdf [file c5nj01583a1.pdf]

**Supporting Information for:**  
**Polydiacetylene-nested Porphyrin Conjugate for Dye-sensitized Solar Cells**

Nuttapol Pootrakulchote,<sup>a</sup> Chawanwit Reanprayoon,<sup>b</sup> Jacek Gasiorowski,<sup>c</sup> Niyazi Serdar Sariciftci<sup>c</sup> and Patchanita Thamyongkit <sup>\*,d</sup>

<sup>a</sup> Department of Chemical Technology, Faculty of Science, Chulalongkorn University, Bangkok 10330, Thailand.

<sup>b</sup> Program in Petrochemistry and Polymer Science, Faculty of Science, Chulalongkorn University, Bangkok 10330, Thailand.

<sup>c</sup> Linz Institute for Organic Solar Cells (LIOS), Institute of Physical Chemistry, Johannes Kepler University Linz, Linz 4040, Austria.

<sup>d</sup> Department of Chemistry, Faculty of Science, Chulalongkorn University, Bangkok 10330, Thailand. Fax: +662-254-1309; Tel: +662-218-7587; E-mail: patchanita.v@chula.ac.th

**Table of Contents**

|                                      |       |
|--------------------------------------|-------|
| Mass spectrum of <b>4</b>            | S2    |
| Characterization data of <b>Zn-4</b> | S3–S5 |
| Emission spectrum of <b>Zn-4</b>     | S6    |

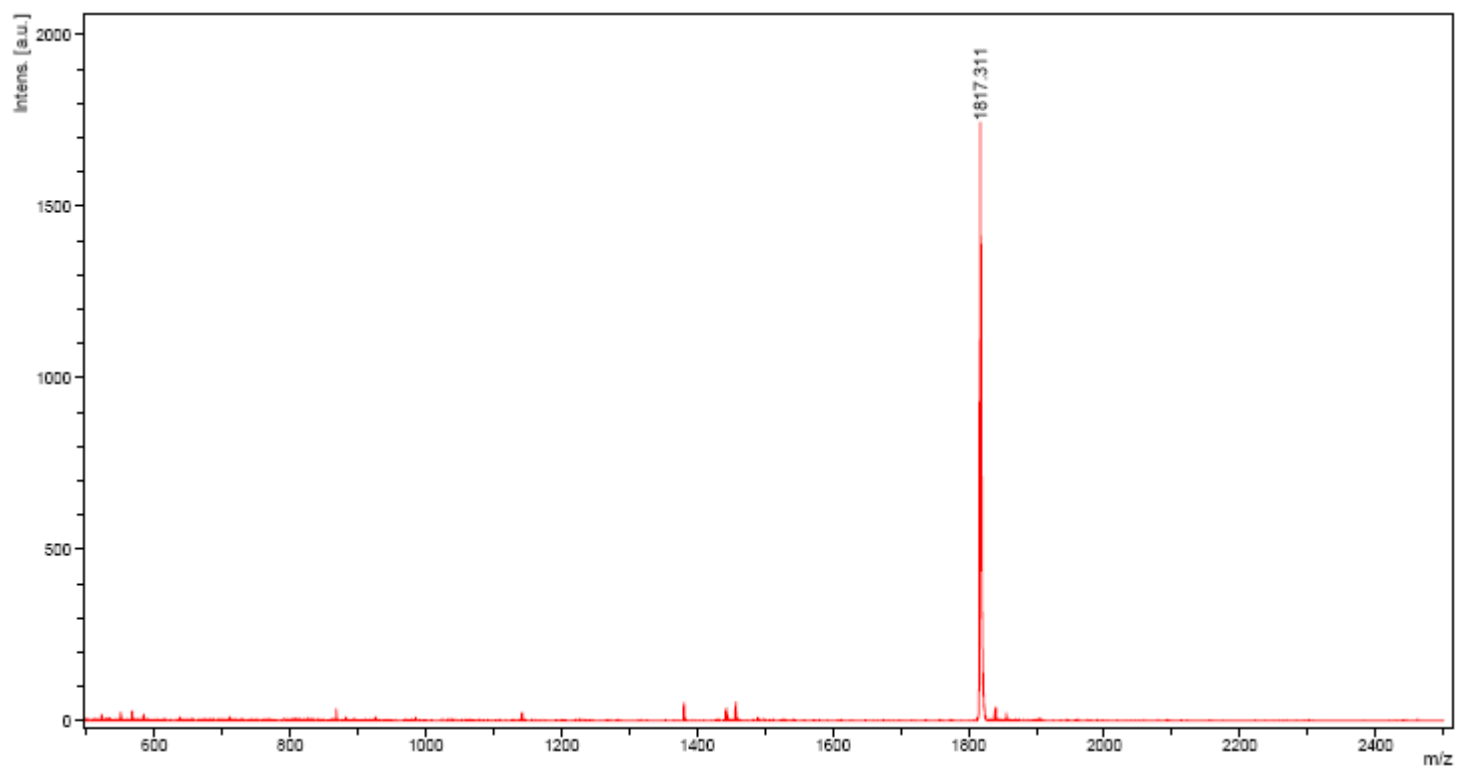

Mass spectrum of compound 4

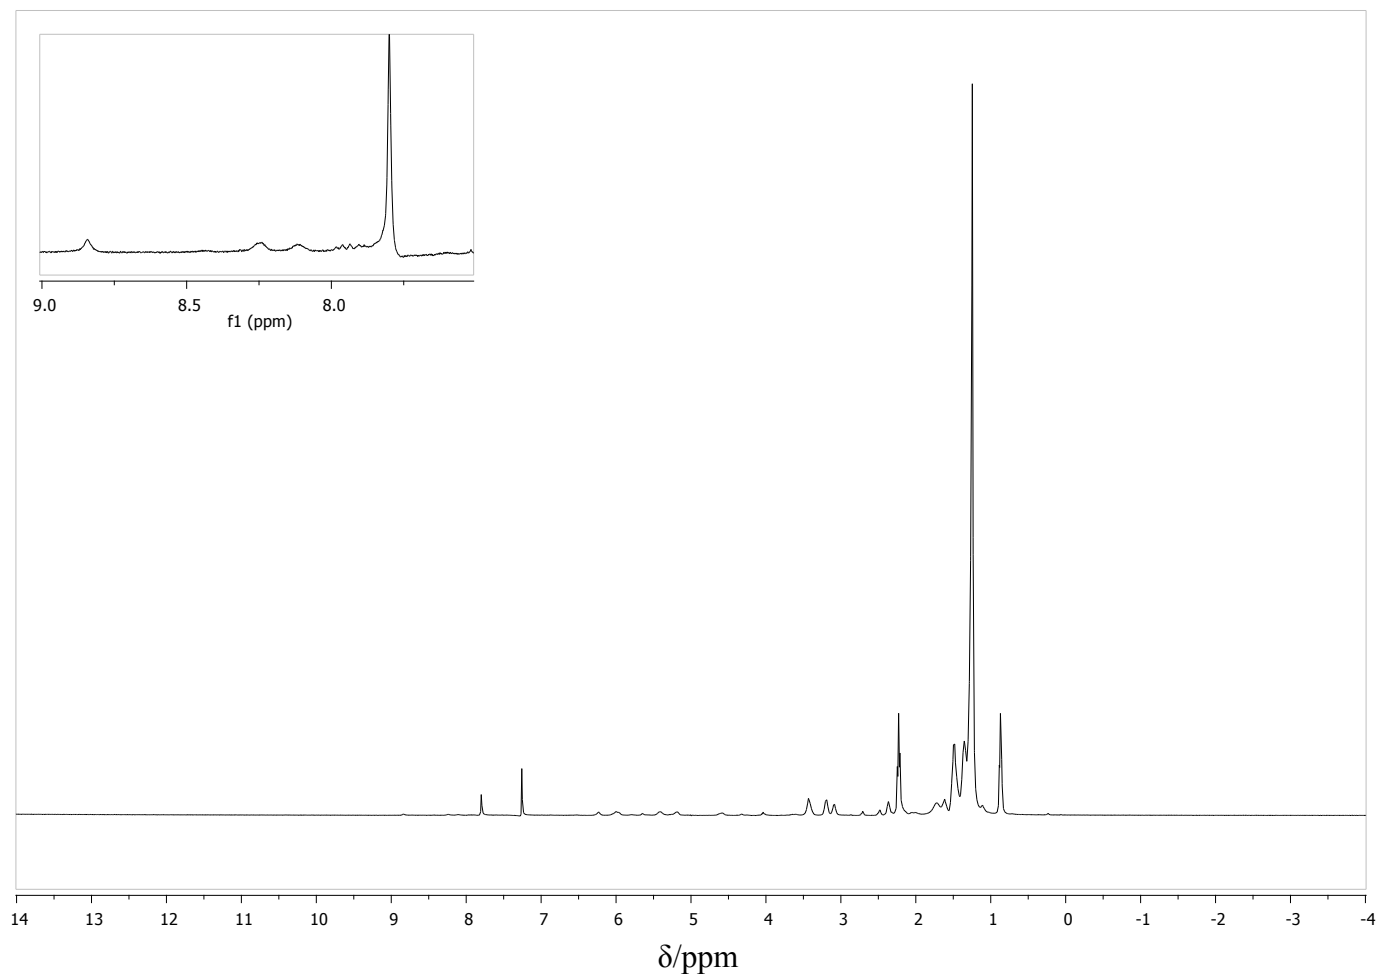

$^1\text{H-NMR}$  spectrum of compound **Zn-4**

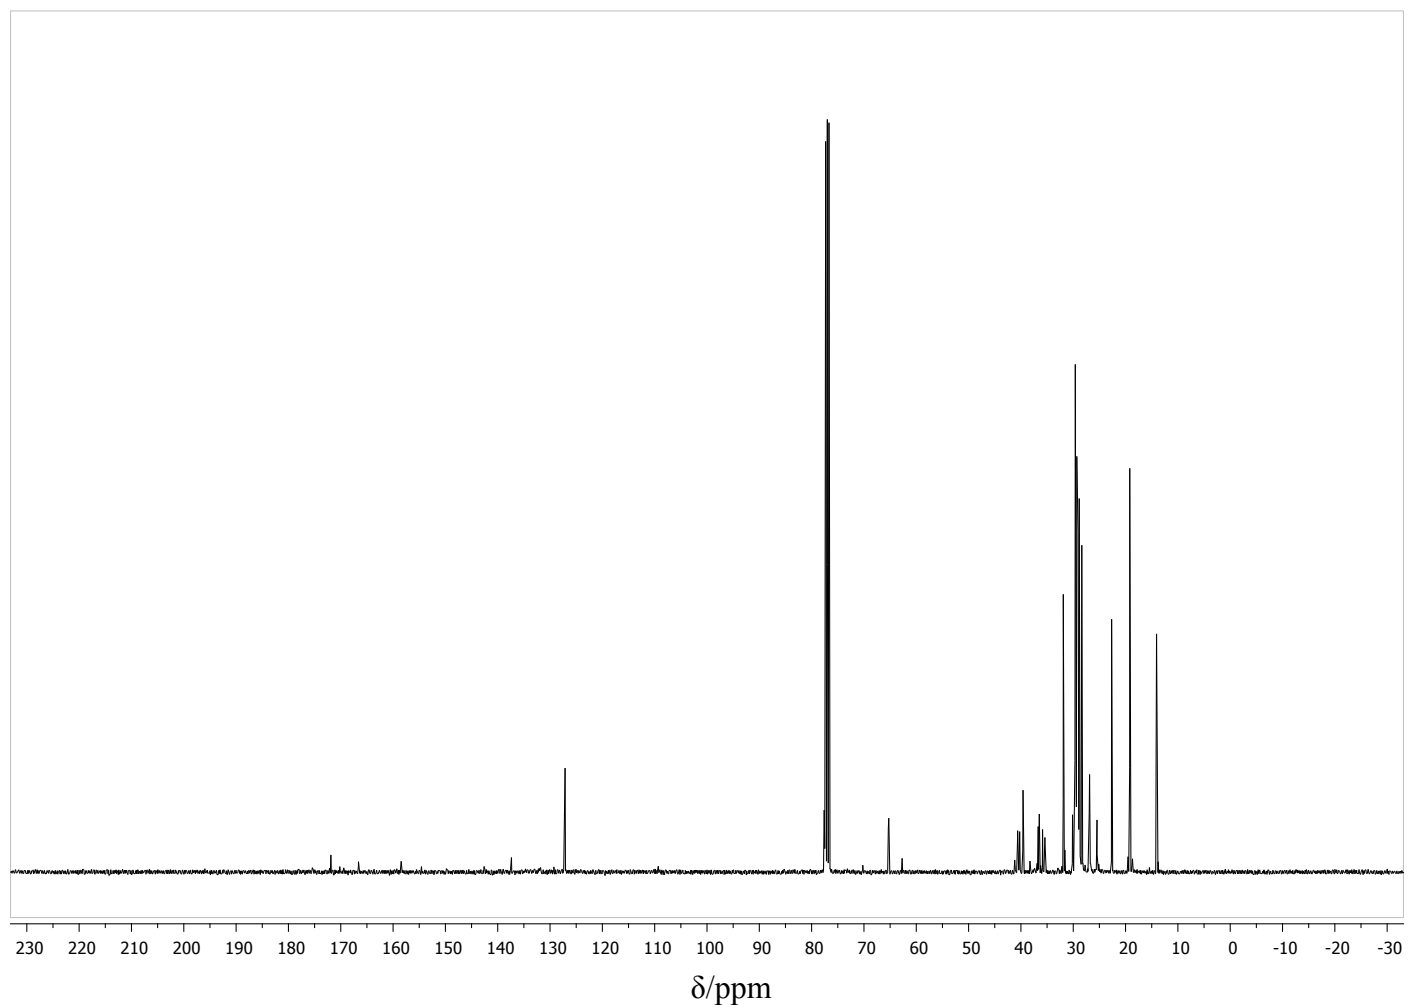

$^{13}\text{C}$ -NMR spectrum of compound **Zn-4**.

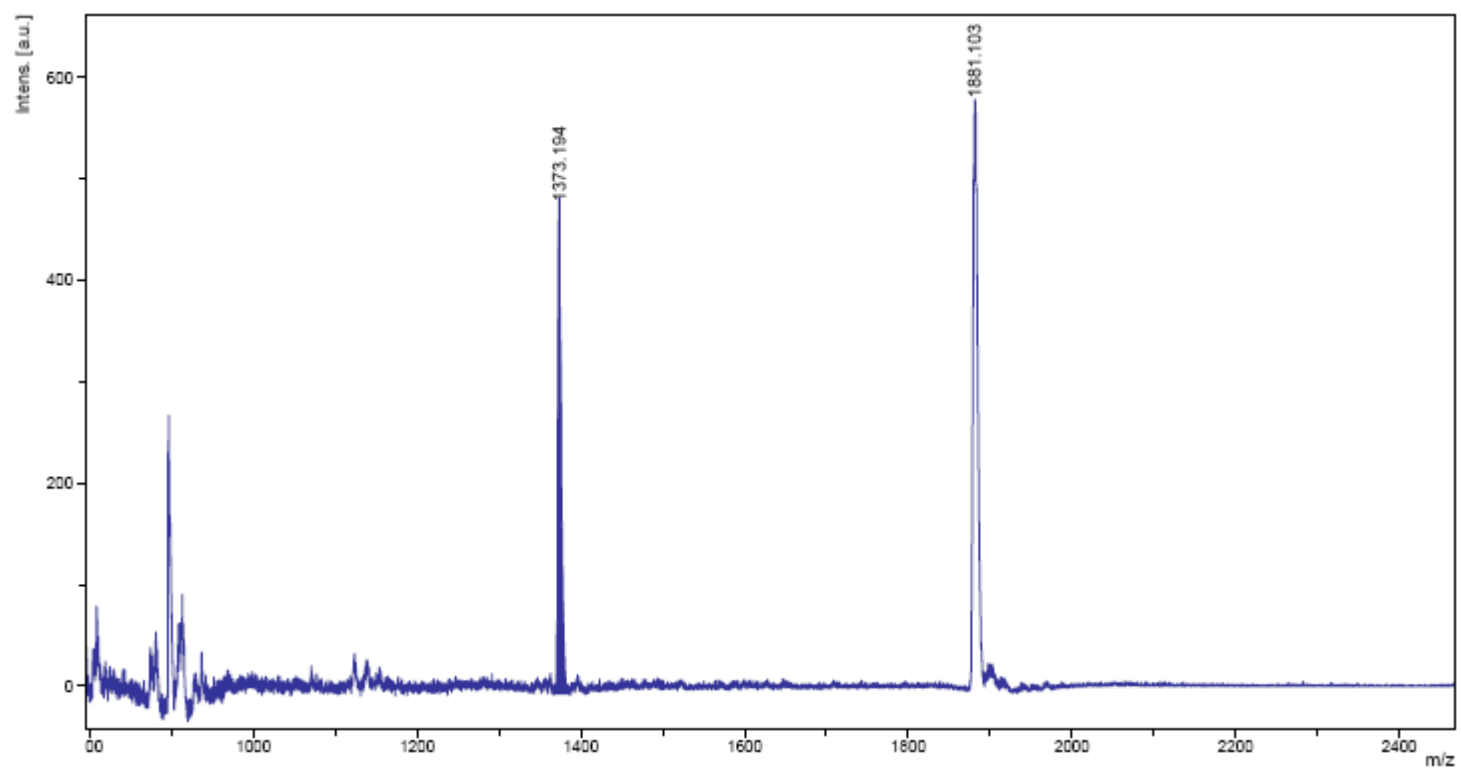

Mass spectrum of compound **Zn-4**

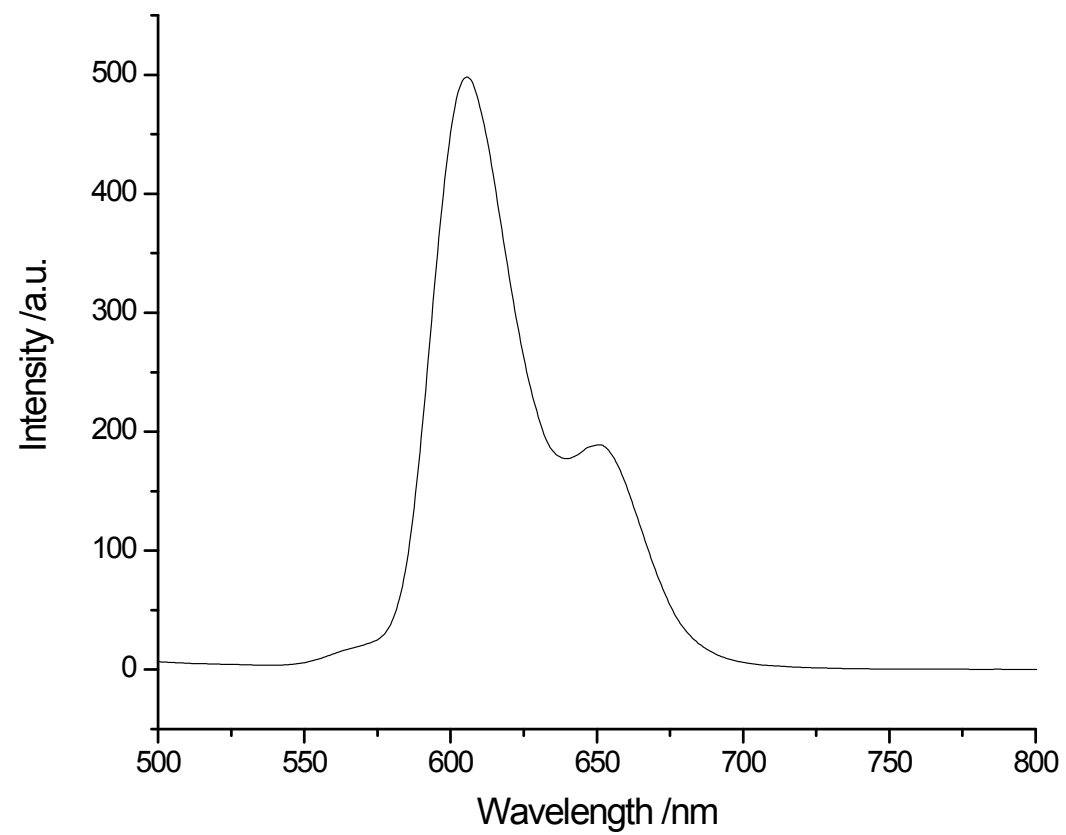

Emission spectrum of compound **Zn-4**
